# Supplementary material for: Eco-Friendly Electroless Template Synthesis of Cu-Based Composite Track-Etched Membranes for Sorption Removal of Lead(II) Ions
Source: MDPI journal article supplement (doi:10.3390/membranes13050495), 2023-05-07
Supplement: s1 [file s1]

## Eco-friendly electroless template synthesis of Cu-based composite track-etched membranes for sorption removal of lead(II) ions

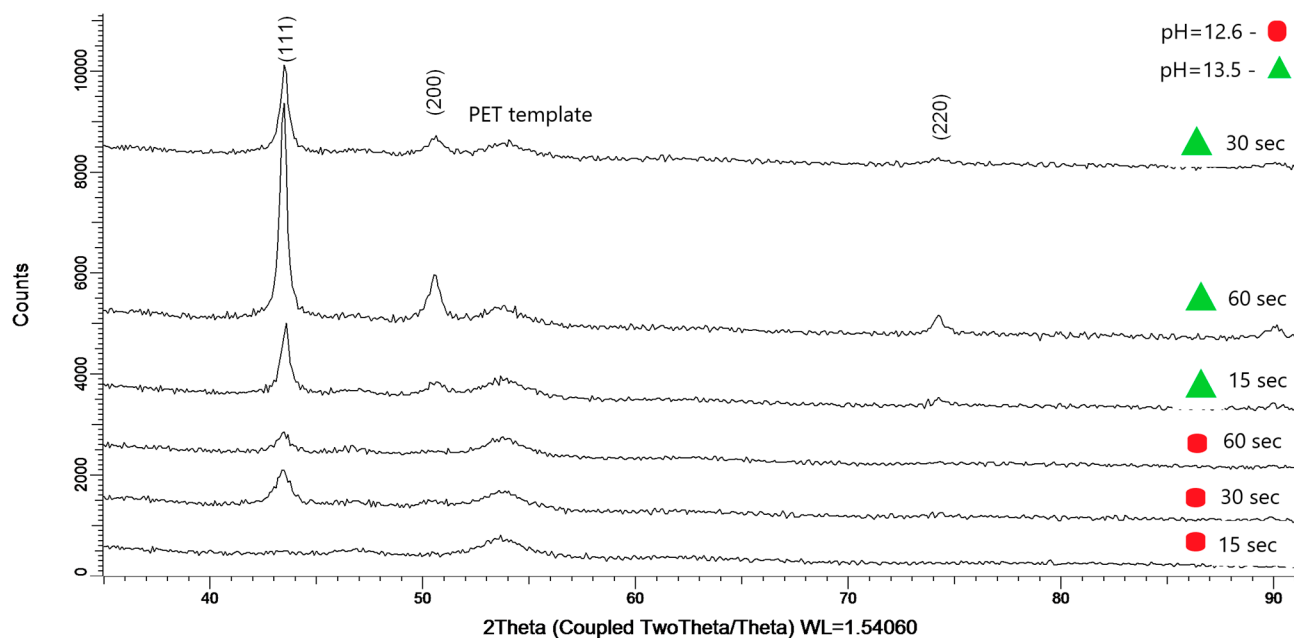

**Figure S1** X-Ray diffraction (XRD) patterns of the Cu\_Gly@PET composite TeMs deposited at the various deposition time

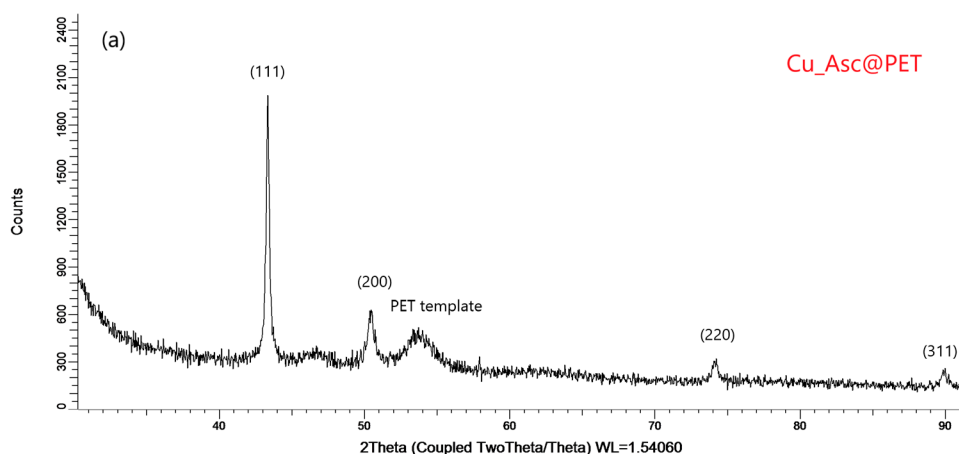

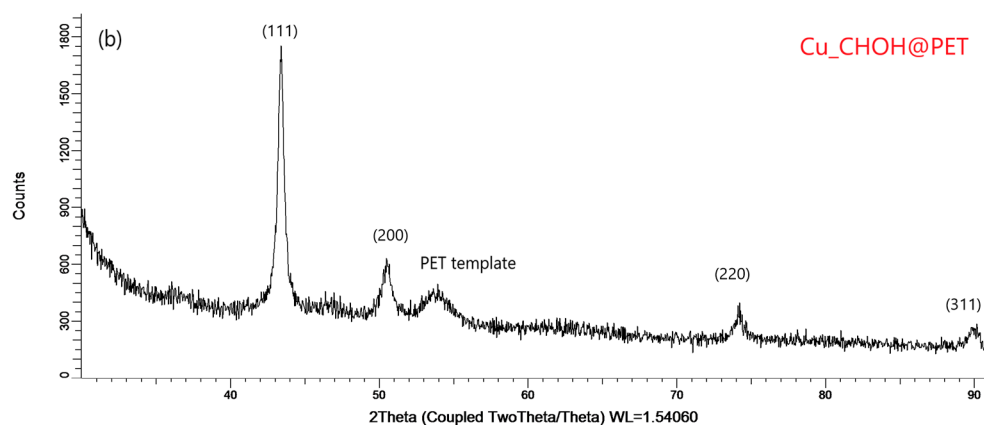

**Figure S2** X-Ray diffraction (XRD) patterns of the Cu\_Asc@PET (a) and Cu\_CHO@PET (b) composite TeMs

**Table S1** - XRD data of composite membranes prepared with ascorbic acid and formaldehyde as a reducing agent

| Composite  | Phase/<br>content,<br>% | (hkl) <sup>a</sup> | 2 $\theta$ ° | d, Å <sup>b</sup> | L, nm <sup>c</sup> | Cell<br>parameter,<br>Å <sup>e</sup> | FWHM <sup>d</sup> | Volume,<br>Å <sup>3</sup> |
|------------|-------------------------|--------------------|--------------|-------------------|--------------------|--------------------------------------|-------------------|---------------------------|
| Cu_Asc@PET | Cu/100                  | 111                | 43.384       | 2.08403           | 38.89              | a=3.608                              | 0.244             | 46.97                     |
|            |                         | 200                | 50.384       | 1.80968           | 19.92              |                                      | 0.490             |                           |
|            |                         | 220                | 73.999       | 1.27997           | 27.59              |                                      | 0.401             |                           |
|            |                         | 311                | 89.845       | 1.09158           | 27.66              |                                      | 0.451             |                           |
| Cu_CHO@PET | Cu/100                  | 111                | 43.410       | 2.08284           | 20.36              |                                      | 0.466             | 46.88                     |
|            |                         | 200                | 50.537       | 1.80457           | 17.37              |                                      | 0.562             |                           |
|            |                         | 220                | 74.139       | 1.27790           | 41.94              |                                      | 0.294             |                           |

<sup>a</sup> Miller indices for corresponding planes; <sup>b</sup> spacing between planes; <sup>c</sup> average crystallite size; <sup>d</sup> full-width at half-maximum; <sup>e</sup> crystal lattice parameter.

**Table S2.** Structural properties of the composite track-etched membranes (TeMs).

| Composite  | Structural Parameters of Embedded MTs, nm |                   | Deposition Rate, R,<br>mg/(cm <sup>2</sup> h) | Amount of Cu<br>Loaded, mg/cm <sup>2</sup> |
|------------|-------------------------------------------|-------------------|-----------------------------------------------|--------------------------------------------|
|            | Wall<br>Thickness                         | Inner<br>Diameter |                                               |                                            |
| Cu_CHO@PET | 73.7 ± 8.5                                | 269.0 ± 10.5      | 5.52                                          | 0.77 ± 0.03                                |
| Cu_Asc@PET | 15.2 ± 3.7                                | 352.6 ± 12.0      | 0.56                                          | 0.67 ± 0.06                                |
